1 **Mapping geographic and demographic shifts in container breeding mosquito-borne**  
2 **disease transmission suitability in Central and South America in a warming world**

3  
4  
5 Sadie J. Ryan<sup>1</sup>, Catherine A. Lippi<sup>1</sup>, Anna M Stewart-Ibarra<sup>2</sup>

6 <sup>1</sup> Quantitative Disease Ecology and Conservation (QDEC) Lab, Department of Geography and  
7 the Emerging Pathogens Institute, University of Florida, Gainesville, FL 32611 USA

8 <sup>2</sup> InterAmerican Institute for Global Change Research, Montevideo, Uruguay  
9

10  
11 **Abstract**

12 The recent Intergovernmental Panel on Climate Change Sixth Assessment Report (IPCC-AR6)  
13 report brought into sharp relief the potential health impacts of a changing climate across large  
14 geographic regions. It also highlighted the gaps in available evidence to support detailed  
15 quantitative assessments of health impacts for many regions. In an increasingly urbanizing  
16 world, there is a need for additional information about the risk of mosquito-borne diseases from  
17 vectors adapted to human water storage behavior. Specifically, a better understanding of the  
18 geographic distribution of disease risk under different scenarios of climate warming and human  
19 populations shifts. For the Central and South America chapter of the IPCC Working Group II  
20 report, regional extractions of published projections of dengue and Zika risk in a changing  
21 climate were generated by one of the authors of this study. In that process, the lack of a  
22 compendium of available published risk estimates became apparent. This paper responds to  
23 that need and extends the scope of the IPCC report results for Central and South America. We  
24 present novel geospatial descriptions of risk for transmission for five mosquito-borne disease  
25 systems under future projected climate and demographic scenarios, including the potential risk  
26 for malaria in the event of the introduction and establishment of a vector of high global concern,  
27 *Anopheles stephensi*. We then present country-level and IPCC geospatial sub-region risk  
28 descriptions under baseline and future projected scenarios. By including demographic  
29 projections using the shared socioeconomic pathway (SSP) scenarios, we capture potential  
30 future risk in a way that is transparent and straightforward to compare and replicate. The goal of  
31 this paper is to report on these model output data and their availability. From a sub-regional  
32 perspective, the largest proportional gains in risk will be seen in the Southwestern South  
33 America (SWS) sub-region, comprising much of the southwestern coastline, for which suitability  
34 for *Aedes aegypti* transmitted dengue and Zika risk will see massive increases with warming,  
35 putting a large number of people at risk under future scenarios. In contrast, at the country level,  
36 the largest projected population risk impacts will be seen in Brazil for both arboviral and  
37 potential introduced malaria risk, despite some risks projected to decrease as parts of the  
38 country are too hot to sustain transmission risk. This paper provides modeled outputs for future  
39 use, in addition to broad summary descriptions at regional and country levels.  
40

41 **Keywords:** IPCC, dengue, malaria, *Aedes aegypti*, *Aedes albopictus*, *Anopheles stephensi*,  
42 climate change, shifting risk, Central and South America, Americas  
43  
44

45 **Introduction**

46 Ongoing and future climate change is expected to continue to have profound impacts on the  
47 global distribution and burden of many mosquito-borne diseases (MBDs) [1–5]. Nearly every link  
48 in the transmission chain of vector-borne pathogens is mediated by environmental influences,  
49 notably on vector reproduction and behavior, and pathogen replication [1,4]. The ideal  
50 conditions that drive vector-borne transmission systems vary with different vector-pathogen  
51 combinations. Still, many MBDs of public health importance, including malaria, yellow fever,  
52 dengue fever, and Zika, are typically associated with the tropics [1].

53

54 Increasing global temperatures are projected to expand the suitable transmission range of  
55 MBDs in some areas. However, these changes are not expected to result in uniformly elevated  
56 transmission risk throughout all regions. Rather, we expect that there will be shifts in the  
57 geographic expanse of MBD thermal transmission suitability [5]. As subtropical and temperate  
58 areas warm, becoming more suitable for the transmission of historically tropical diseases, other  
59 locations currently associated with high MBD incidence may become too hot, exceeding the  
60 physiological thermal limits of pathogens and vectors. While decreasing MBD suitability may  
61 seem advantageous at face value, any decrease in risk may be grossly outweighed by  
62 cumulative gains in the geographic area of suitability, the extension of transmission season  
63 length in locations that currently experience low MBD burden, or the expansion of the  
64 geographic range of transmission suitability into high population centers. It is also vital for public  
65 health planners to understand the shifting risk of MBDs against the backdrop of not only a  
66 changing climate, but also the movement of people on the landscape.

67

68 As the world experiences climate warming, we are simultaneously experiencing changes to the  
69 global human population, such as increasing urbanization, population densities, contact rates,  
70 and movements of people, goods, pathogens, and vectors. These changes directly affect MBD  
71 risk, particularly in urban and periurban environments. The spread of novel mosquito vectors  
72 has, in many instances, been linked to international trade networks and the movement of goods.  
73 For example, the expansion of *Ae. albopictus* via maritime transport, the used tire trade, and  
74 ground transportation networks [6], and recent detections of *An. stephensi* near seaports [7],  
75 and in a livestock quarantine station [8]. Human water storage practices and behaviors can  
76 create reservoirs of suitable habitat for mosquito oviposition on landscapes with otherwise  
77 inadequate precipitation. Water use and storage practices have consistently been identified as a  
78 major risk factor for urban dengue throughout Latin America, influencing household risk of

79 infection [9–11], mosquito presence [12–17], and driving vector activity in arid cities [18].  
80 Because of the profound influence that human activity has on vector distributions and MBD risk,  
81 it is therefore prudent to consider the intersection of thermal suitability and socioeconomic  
82 factors when estimating overall future vector suitability and population-level risk to humans.

83  
84 Previous studies have made efforts to delineate potential shifts in the geography of MBD  
85 transmission risk driven by climate change [2,4,19,20]. Much of this work has focused on the  
86 transmission of *Plasmodium falciparum* malaria in Africa, given its considerable global health  
87 burden. Although malaria remains a public health concern in the Americas, outbreaks of  
88 arboviral diseases currently place larger resource strains on many public health systems  
89 throughout Latin America. Dengue fever is a major public health issue throughout Central and  
90 South America. In 2019, the Pan American Health Organization (PAHO) reported more than 3.1  
91 million cases in the Americas, which included 28,176 severe cases and 1,535 deaths [21,22].  
92 Following the unprecedented 2019 outbreak, dengue fever outbreaks continue to burden public  
93 health systems, which also had to contend with the devastating effects of the SARS-CoV-2  
94 pandemic [22]. Zika virus, which swept through the region in 2016, imposed a high burden  
95 throughout Latin America as an emerging pathogen. While cases have dropped precipitously in  
96 many countries following the pandemic, Zika is still circulating in the Americas (over 40,000  
97 cases reported in 2022 [23], and has the potential to trigger future outbreaks as population-level  
98 immunity wanes.

99  
100 Malaria incidence has declined greatly throughout the Americas in recent decades, where  
101 cases have dropped by 70% between 2000 and 2021 [24]. Historically, *P. falciparum* accounted  
102 for the bulk of regional cases in Latin America, though following eradication efforts, most malaria  
103 burden is currently attributable to *P. vivax* [24,25]. Several regions in Central and South  
104 America have successfully achieved local malaria elimination through concerted vector control  
105 efforts, including Belize [26], El Salvador [27], Argentina, Paraguay [28], and the Ecuadorian-  
106 Peruvian border [29]. Nevertheless, localized hotspots of malaria activity persist, and have even  
107 increased, throughout the region. The reemergence of malaria remains a concern for public  
108 health officials [30], particularly in the Amazon region [25], which includes portions of southern  
109 Venezuela and Brazil [31,32].

110  
111 In addition to the current threat of reemergence, the invasive mosquito *Anopheles stephensi*  
112 would further complicate the landscape of malaria transmission in the Americas should this

113 vector become established. Global projections of thermal suitability already indicate that the  
114 Americas are suitable for establishment and transmission, should the vector be introduced [33].  
115 Adept at transmitting both *P. falciparum* and *P. vivax*, *An. stephensi* has aggressively expanded  
116 its range in recent years and is associated with increased malaria outbreaks in the Horn of  
117 Africa [34]. Perhaps most troublesome, this vector has life history characteristics that mirror  
118 container-breeding *Aedes spp.*, presenting the unprecedented risk of urban malaria  
119 transmission in its introduced range [34].

120

121 Studies focusing on exposure risk solely by geographic region or landscape suitability may not  
122 communicate the most useful information for public health planning. Expressing risk in terms of  
123 estimated population exposure, or people at risk (PAR), clearly demonstrates to stakeholders  
124 the potential impact of shifting MBD transmission suitability on health infrastructure. This is a  
125 salient point for informing policy in Latin America, where public health authorities grapple with  
126 limited resources in the face of large MBD outbreaks. Further to this point, many of Latin  
127 America's major population centers are located in coastal areas, and uneven population  
128 distributions mean that assessing potential exposure to risk purely in terms of geographic area  
129 does not capture the nuance of projected health burdens.

130

131 This study aims to generate model-based descriptions of container breeding MBD risk for IPCC-  
132 designated sub-regions in Central and South America, and country-level summary information  
133 under baseline and future climate projections and using corresponding population projections  
134 from the Global Population of the World (GPW4) and Shared Socioeconomic Pathways (SSPs)  
135 products. This work is the first effort to bring mapped temperature suitability models for currently  
136 circulating arboviral vector and disease risks and malaria transmission under the scenario of a  
137 potential novel vector (*An. stephensi*) together in one framework, facilitating comparisons of risk  
138 across diseases, climate change scenarios, and countries in these regions. In order to make  
139 these results available and useful for decision-making and planning, the resulting rasterized  
140 model outputs, and both IPCC sub-regional and country-level data are freely and openly  
141 available via the Harvard Dataverse (XXX URL upon publication).

142

## 143 **Materials and Methods**

144 *Geographic coverage* – In this study, we projected models of thermal suitability for MBDs to  
145 Central and South America, describing risk for two arboviral diseases with vectors that are well  
146 established in the Americas (i.e., dengue and Zika), in addition to two potential scenarios of

147 malaria transmission by invasive *An. stephensi*, which is not currently present in Latin America.  
 148 In addition to describing risk by country, we also summarized model output by geographic sub-  
 149 regions, as defined by the Intergovernmental Panel on Climate Change (IPCC), which  
 150 encompass 19 countries (Table 1, and seen in Figs 1,2,3,5,6). The 8 IPCC reference sub-  
 151 regions used in this study are Southern Central America (SCA), Northern South America (NSA),  
 152 Northwestern South America (NWS), Northeastern South America (NES), Southwestern South  
 153 America (SWS), Southeastern South America (SES), Southern South America (SSA), and  
 154 South American Monsoon (SAM) [35].

155

156 **Table 1.** Central and South American countries with associated IPCC sub-regions.

| Region          | Country     | IPCC Sub-region         |
|-----------------|-------------|-------------------------|
| Central America | Belize      | SCA                     |
|                 | Costa Rica  | SCA                     |
|                 | El Salvador | SCA                     |
|                 | Guatemala   | SCA                     |
|                 | Honduras    | SCA                     |
|                 | Nicaragua   | SCA                     |
|                 | Panama      | SCA, NWS                |
| South America   | Argentina   | SES, SWS, SSA           |
|                 | Bolivia     | SAM, SES, SWS           |
|                 | Brazil      | NSA, NES, NWS, SAM, SES |
|                 | Chile       | SWS, SSA                |
|                 | Colombia    | NWS                     |
|                 | Ecuador     | NWS                     |
|                 | Guyana      | NSA                     |
|                 | Paraguay    | SES, SAM                |
|                 | Peru        | NWS, SAM, SWS           |
|                 | Suriname    | NSA                     |
|                 | Uruguay     | SES                     |
|                 | Venezuela   | NSA, NWS                |

157

158 *Thermal suitability models* – We geographically projected published, temperature-driven  
 159 mechanistic models to map the thermal suitability of mosquito-borne pathogen transmission for  
 160 five vector-pathogen combinations. These included models of dengue virus transmission by  
 161 *Aedes aegypti* and *Aedes albopictus* [36], Zika virus transmission by *Ae. aegypti* [37], and  
 162 models of two malaria parasites (*Plasmodium falciparum* and *P. vivax*) transmitted by *An.*  
 163 *stephensi* [38]. In this study, we used the critical thermal (temperature) bounds for dengue  
 164 transmission by *Aedes aegypti* and *Ae. albopictus*, identified in Mordecai et al. 2017 [36], Zika  
 165 transmission from Tesla et al., 2018 [37], and malaria transmission by *An. stephensi* from  
 166 Villena et al. 2022 [38] to map thermal transmission suitability in Central and South America,  
 167 taking values where the temperature-dependent transmission suitability metric for each

168 mosquito:pathogen was greater than zero ( $S(T) > 0$ ), with posterior probabilities greater than  
169 0.975. The thermal limits used for dengue transmission are as follows: 21.3-34.0°C by *Ae.*  
170 *aegypti*, and 19.9 - 29.4°C by *Ae. albopictus*; for Zika transmitted by *Ae. aegypti*: 23.9 - 34.0°C;  
171 and for malaria transmitted by *An. stephensi*: 16.0 - 36.5°C for *P. falciparum*, and 16.6 - 31.7°C  
172 for *P. vivax*.

173

174 *Climate data* – We used the WorldClim v1.4 product as our baseline climate data for model  
175 projections. Climate model output data for future scenarios were downloaded from the  
176 Consultative Group for International Agricultural Research (CGIAR) research program on  
177 Climate Change, Agriculture, and Food Security (CCAFS) web portal ([http://ccafs-  
178 climate.org/data\\_spatial\\_downscaling/](http://ccafs-climate.org/data_spatial_downscaling/)). All climate data were obtained at a resolution of 5-arc  
179 minutes. We used climate data inputs at three time horizons: 2030, 2050, and 2080, to project  
180 thermal models, using ensemble forecasts from the AR5 Archive under two representative  
181 concentration pathways (RCP 4.5 and RCP 8.5), and four general circulation models (GCMs)  
182 following methods described in Ryan et al. 2020 and Ryan, Lippi, and Zermoglio 2020 [19,39].  
183 The GCMs used in this study were the Beijing Climate Center Climate System Model (BCC-  
184 CSM1.1); the Hadley GCM (HadGEM2-AO and HadGEM2-ES); and the National Center for  
185 Atmospheric Research's Community Climate System Model (CCSM4).

186

187 *Population data* – We used the 2015 Global Population of the World (GPW) gridded population  
188 as our baseline for population descriptions. For the future population projections, we chose to  
189 use the Shared Socioeconomic Pathways (SSPs) projections [40–42] for the following plausible  
190 combinations: RCP 4.5 x SSP2 and RCP 8.5 x SSP5 [43]. We thus selected the corresponding  
191 projected populations for 2030, 2050, 2080 for each RCPxSSP combination.

192 *Mapping population at risk* – Risk maps incorporating climate information can be an important  
193 decision-support tool for the public health sector, part of an integrated climate adaptation  
194 strategy. To facilitate the utility of this type of geospatial modeling output for public health  
195 decision-making, and regional planning, it is important to generate information using the  
196 geographic designations from major decision-making bodies, but also provide country-level  
197 summary information. We summarized 'risk' in terms of the number of people subject to x  
198 months of transmission-suitable mean temperature, for dengue (both for *Ae. aegypti* and *Ae.*  
199 *albopictus* transmission) following Ryan et al. 2019 [2], for Zika transmission by *Ae. aegypti*  
200 following Ryan et al. 2021 [2,20], and for transmission of *P. falciparum* and *P. vivax* by *An.*

201 *stephensi* following Ryan et al. 2023 [33]. We summarized PAR by both country and IPCC  
202 climate reference regions for Central and South America. For ease of interpretation, we followed  
203 methodology similar to that in Ryan et al. 2019, 2021, and 2023, summarizing the risk in terms  
204 of year-round transmission suitability (12 months), or any risk (one or more months of suitability)  
205 [2,20,33]. Mechanistic transmission models were projected onto climate data in R (v. 4.1.2) with  
206 the package ‘raster’ [44] (including some operations updated to use package ‘terra’ [45]), and  
207 monthly mean temperatures were thresholded according to the thermal suitability limits for each  
208 vector:pathogen pairing. The number of suitable months of transmission was then summed (0–  
209 12) in a pixel-wise analysis for Central and South America, and monthly suitability maps were  
210 produced for baseline and future scenarios using ArcGIS ver. 10.1 [46].

211

## 212 **Results**

### 213 *Dengue transmitted by Aedes aegypti*

214 Under current climate conditions, much of the NSA, NWS, SAM, and NES regions are suitable  
215 for year-round dengue transmission by *Ae. aegypti* mosquitoes (Fig. 1). At baseline climate and  
216 population projections, there are collectively more than 350 million PAR of exposure to one or  
217 more months of thermal transmission suitability for dengue transmission by *Ae. aegypti* (Table  
218 2). We found that the SES region, which spans Uruguay and portions of southern Brazil, Bolivia,  
219 Paraguay, and Argentina, has the highest PAR, with over 120.5 million. Under all realizations of  
220 climate and population scenarios, this risk increase ranges from 22-57% (Fig. 2).

221

222 **Table 2.** Total People at Risk (PAR) for thermal suitability for transmission (i.e. dengue virus  
 223 transmitted by *Ae. aegypti* or *Ae. albopictus*, and Zika virus transmitted by *Ae. aegypti*) in  
 224 Central and South America, and potential (PAR) for thermal suitability of malaria transmission  
 225 (i.e. *P. falciparum* or *P. vivax* transmitted by *An. stephensi*), at baseline climate (BAS), and  
 226 under two representative concentration pathways (RCP 4.5 and RCP 8.5) paired with a shared  
 227 socioeconomic pathway projection of population growth (RCP 4.5 × SSP2; RCP  
 228 8.5 × SSP5).  
 229

| RCP                       | Year | Dengue<br>(Aeae) | Dengue<br>(Aeal) | Zika<br>(Aeae) | Pf<br>(Anst) | P. v<br>(Anst) |
|---------------------------|------|------------------|------------------|----------------|--------------|----------------|
| <b>Year-round</b>         |      |                  |                  |                |              |                |
| <b>BAS</b>                | BAS  | 159,180,964      | 197,420,102      | 91,838,462     | 220,607,292  | 203,159,516    |
| <b>RCP 4.5</b>            | 2030 | 201,825,533      | 182,305,137      | 127,602,349    | 215,066,886  | 199,180,746    |
|                           | 2050 | 229,097,939      | 186,489,806      | 150,107,888    | 244,595,377  | 211,245,718    |
|                           | 2080 | 224,167,144      | 157,216,184      | 151,651,366    | 239,184,304  | 174,643,278    |
| <b>RCP 8.5</b>            | 2030 | 189,986,948      | 169,313,917      | 122,687,965    | 208,703,756  | 188,429,129    |
|                           | 2050 | 210,407,842      | 152,413,156      | 145,058,105    | 223,025,844  | 175,248,008    |
|                           | 2080 | 186,855,238      | 61,937,402       | 123,820,908    | 227,531,775  | 101,570,325    |
| <b>One or more months</b> |      |                  |                  |                |              |                |
| <b>BAS</b>                | BAS  | 350,515,629      | 397,003,912      | 238,887,277    | 441,839,796  | 437,846,464    |
| <b>RCP 4.5</b>            | 2030 | 436,378,377      | 457,108,522      | 348,811,175    | 493,856,353  | 492,307,527    |
|                           | 2050 | 478,169,505      | 494,521,497      | 395,021,885    | 539,858,100  | 529,684,946    |
|                           | 2080 | 471,423,654      | 478,659,035      | 384,979,289    | 523,242,636  | 520,957,393    |
| <b>RCP 8.5</b>            | 2030 | 416,584,224      | 437,082,268      | 333,102,864    | 472,907,583  | 469,466,943    |
|                           | 2050 | 435,452,610      | 436,770,900      | 355,665,493    | 482,409,166  | 480,652,418    |
|                           | 2080 | 381,767,210      | 354,710,149      | 361,306,590    | 417,967,281  | 415,615,478    |

230 *Aeae*=*Aedes aegypti*; *Aeal*=*Aedes albopictus*; *Anst*=*Anopheles stephensi* (*Pf* = *P. falciparum*,  
 231 *Pv* = *P. vivax*)

232 In contrast, the SWS region, spanning much of Chile and the Western coastal region of South  
 233 America, has the second lowest baseline population risk at around 2.4 million people. Yet, the  
 234 SWS region has the highest project increases in PAR, ranging from increases of 204-374%  
 235 (Fig. 2), as changing climate and population distributions coincide.

236 Conversely, the NES region, comprising northeastern Brazil, has a high baseline of 86.6 million  
 237 PAR for one or more months of transmission. The NES region is largely characterized by up to  
 238 12 months of suitability under current climate conditions, with 54.5 million PAR of year-round  
 239 transmission. Future changes in PAR for the NES region range from small increases in PAR  
 240 (6%) to declining risk (-20%) (Fig. 2), due to a combination of higher temperatures and  
 241 population shifts in response to changing climate.



242 Examining year-round suitability by country, Brazil has the highest risk of exposure under  
243 baseline conditions with over 60 million PAR, which markedly increases under future model  
244 projections (Fig. 5A). Colombia, Venezuela, and Ecuador are projected to experience similar  
245 patterns of increasing PAR, though increasing from much lower baseline populations.

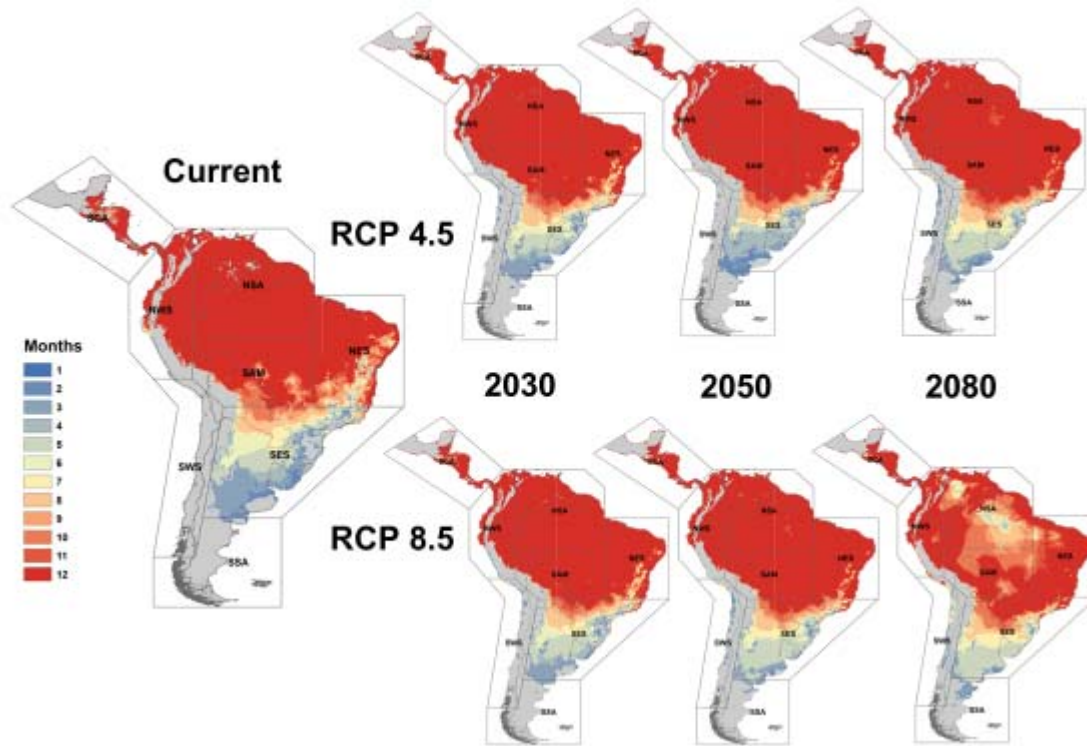

246

247 Fig. 1. Thermal suitability for dengue transmitted by *Aedes aegypti*.

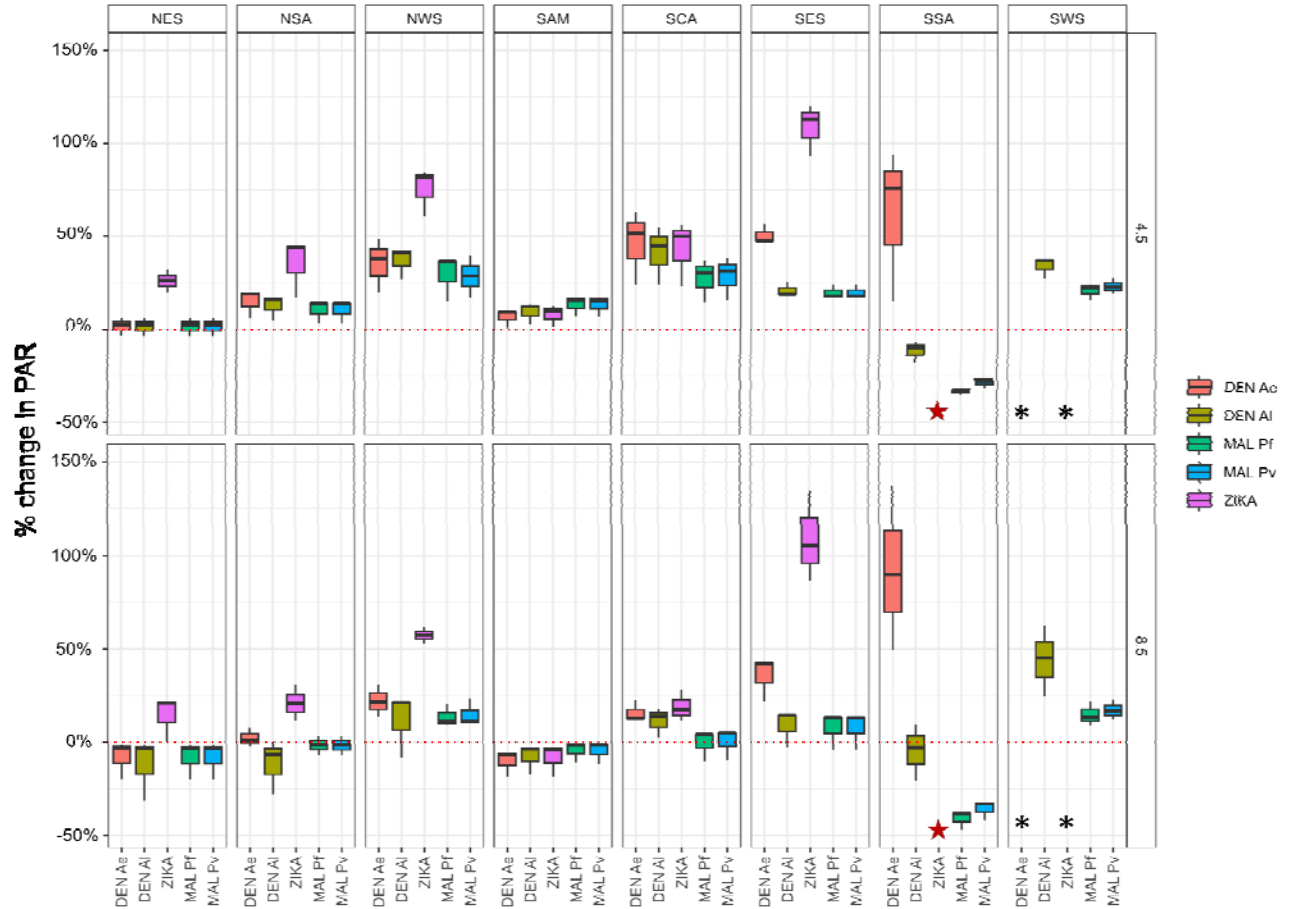

248

249 Figure 2. The percent of change in people at risk (PAR) from baseline to 2030, 2050, 2080  
 250 (given as boxplot) under the two climate projections, RCP 4.5 and RCP 8.5, for the five potential  
 251 MBDs in this study, across the 8 sub-regions of Central and South America defined by IPCC for  
 252 one or more months of suitability. DEN Ae = dengue transmitted by *Aedes aegypti*; DEN Ai =  
 253 Dengue transmitted by *Aedes albopictus*; MAL Pf = *Plasmodium falciparum* malaria transmitted  
 254 by *Anopheles stephensi*; MAL Pv = *P. vivax* malaria transmitted by *An. stephensi*; ZIKA = Zika  
 255 virus transmitted by *Ae. aegypti*. **Note:** at baseline there is no predicted risk for ZIKA in SSA, so  
 256 all change is infinite (red star); SWS, changes exceeded 150% for DEN Ae and ZIKA (black  
 257 asterisks).

258 *Dengue transmitted by Aedes albopictus*

259 Under current climate conditions, much of the NSA, NWS, SAM, and NES regions are suitable  
 260 for year-round dengue transmission by *Ae. albopictus* (Fig. 3). Collectively, there are more PAR  
 261 of dengue transmission by *Ae. albopictus* than by *Ae. aegypti*, with over 397 million PAR for one  
 262 or more months of transmission at baseline (Table 2). This total notably includes Brazil, the  
 263 country with the highest at-risk population under baseline climate conditions, with over 190

264 million PAR for any level of transmission, and over 83 million PAR for year-round transmission  
265 (Fig. 5B).

266 In contrast with dengue transmitted by *Ae. aegypti*, areas of thermal suitability for year-round  
267 *Ae. albopictus* transmission are projected to decrease markedly throughout the NSA, NWS,  
268 NES, SAM, and SES regions. Some of these reductions are also reflected in PAR projections  
269 for one or more months of transmission, where the biggest decreases in transmission exposure  
270 were -20.6 (SSA region under RCP 8.5), -27.9% (NSA region under RCP 8.5), and -31.4%  
271 (NES region under RCP 8.5) (Fig. 2). These range contractions coincide with warming  
272 temperatures, which will exceed the thermal limits for transmission by *Ae. albopictus* throughout  
273 much of these regions in the future.

274 Despite reductions in year-round PAR, projections for any dengue transmission (i.e., one or  
275 more months) by *Ae. albopictus* are projected to increase in many scenarios, by as much as  
276 41.9% (NWS region under RCP 8.5) to 54.5% (SCA region under RCP 4.5) (Fig. 2). Notably,  
277 much of the SCA region in Central America, and coastal portions of the NWS and NES regions  
278 will remain suitable for year-round transmission of dengue, regardless of the scenario, where  
279 countries including Ecuador and Guatemala will experience slight increases in PAR (Fig. 5B).

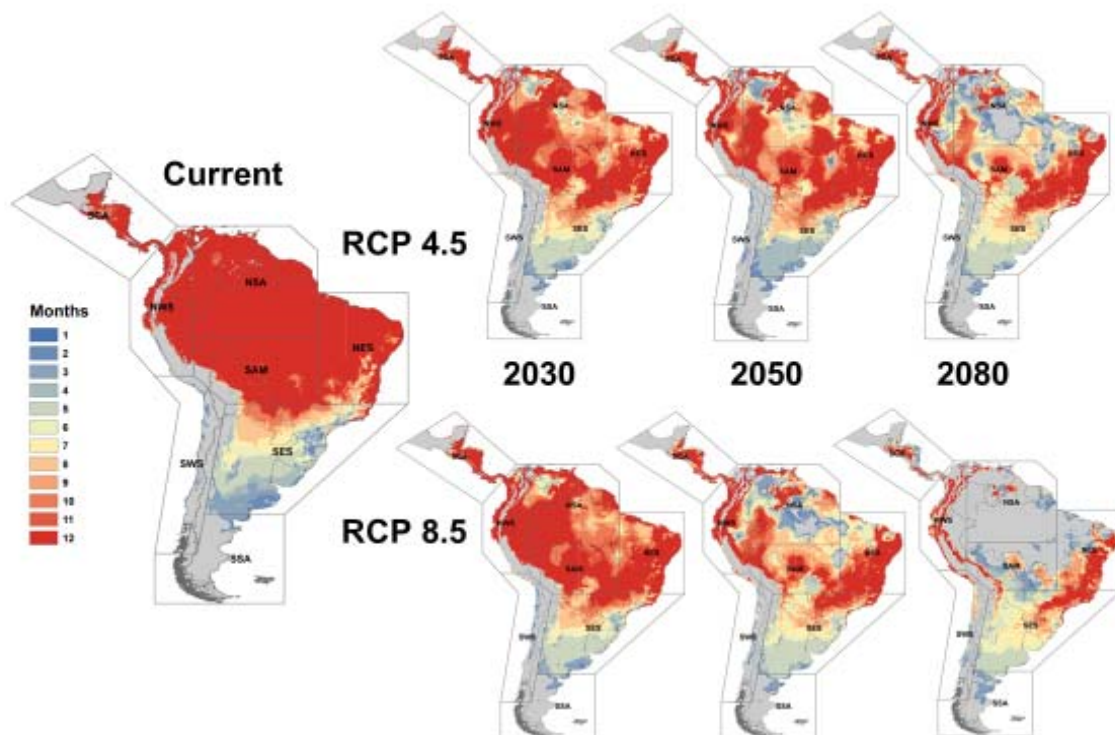

280

281 Fig. 3. Thermal suitability for dengue transmitted by *Aedes albopictus*.

282 *Zika transmitted by Aedes aegypti*

283 Transmission of Zika by *Ae. aegypti* shows different spatial patterns of thermal suitability  
284 compared to dengue transmission. Under current climate conditions, year-round transmission of  
285 Zika is possible throughout most of the NSA region (Fig. 4). The NWS, NES, SCA, and SAM  
286 regions also have distinct areas at risk of year-round Zika transmission, however, these areas  
287 are much reduced compared to present-day dengue risk. Likewise, baseline PAR for Zika  
288 transmission is lower than that of dengue, ranging from approximately 91.8 million PAR for year-  
289 round Zika transmission, and over 238 million PAR for any Zika transmission (Table 2).

290 However, there are considerable gains in areas that will become suitable for Zika transmission  
291 in the future under nearly every scenario of climate change, and this is reflected in collective net  
292 increases in PAR (Table 2). Though baseline PAR is considerably lower for Zika transmission  
293 than dengue, the number of people exposed to potential transmission in the future will increase  
294 across the five countries with the highest PAR (Fig. 5C). Under future conditions, large portions  
295 of the NES, NWS, SAM, and SCA regions will see increased transmission suitability, and this  
296 will correspond with increasing PAR in most scenarios (Fig. 2). A long-term estimate under the  
297 most extreme scenario of climate change (i.e., 2080 under RCP 8.5) predicts shifting risk in  
298 NSA and SAM regions, where there are some reductions in estimated suitability, though overall  
299 suitability will still be greater than present-day conditions.

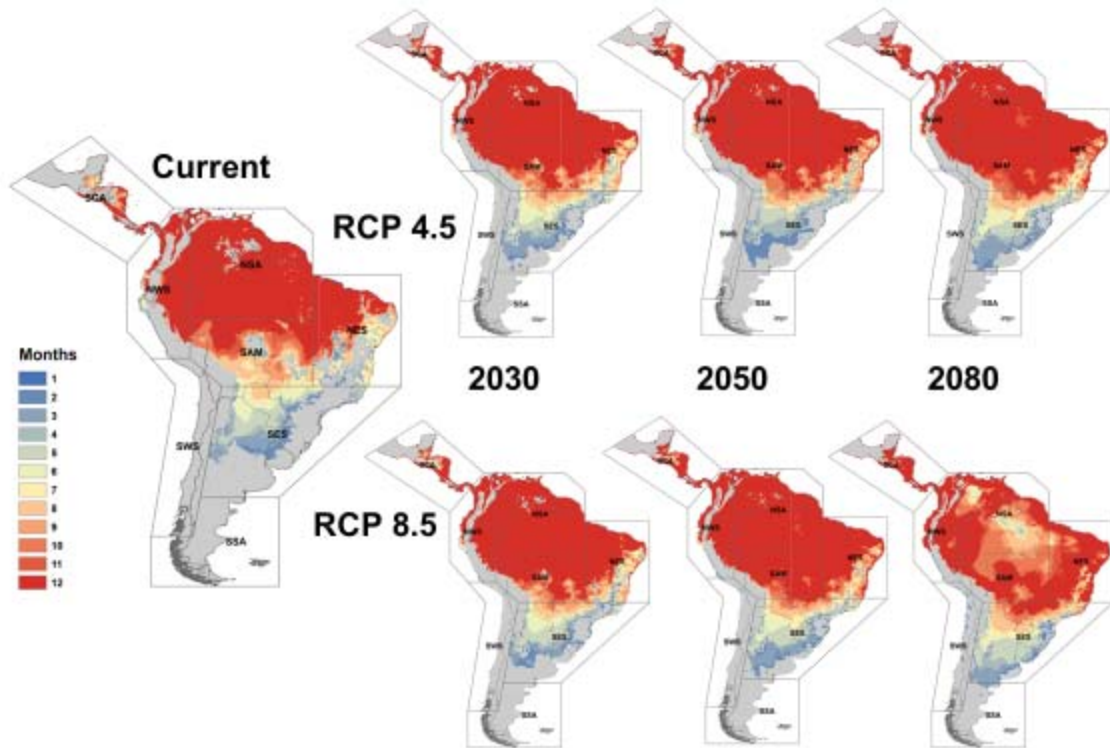

300

301 Fig. 4 Thermal suitability for Zika transmitted by *Aedes aegypti*.

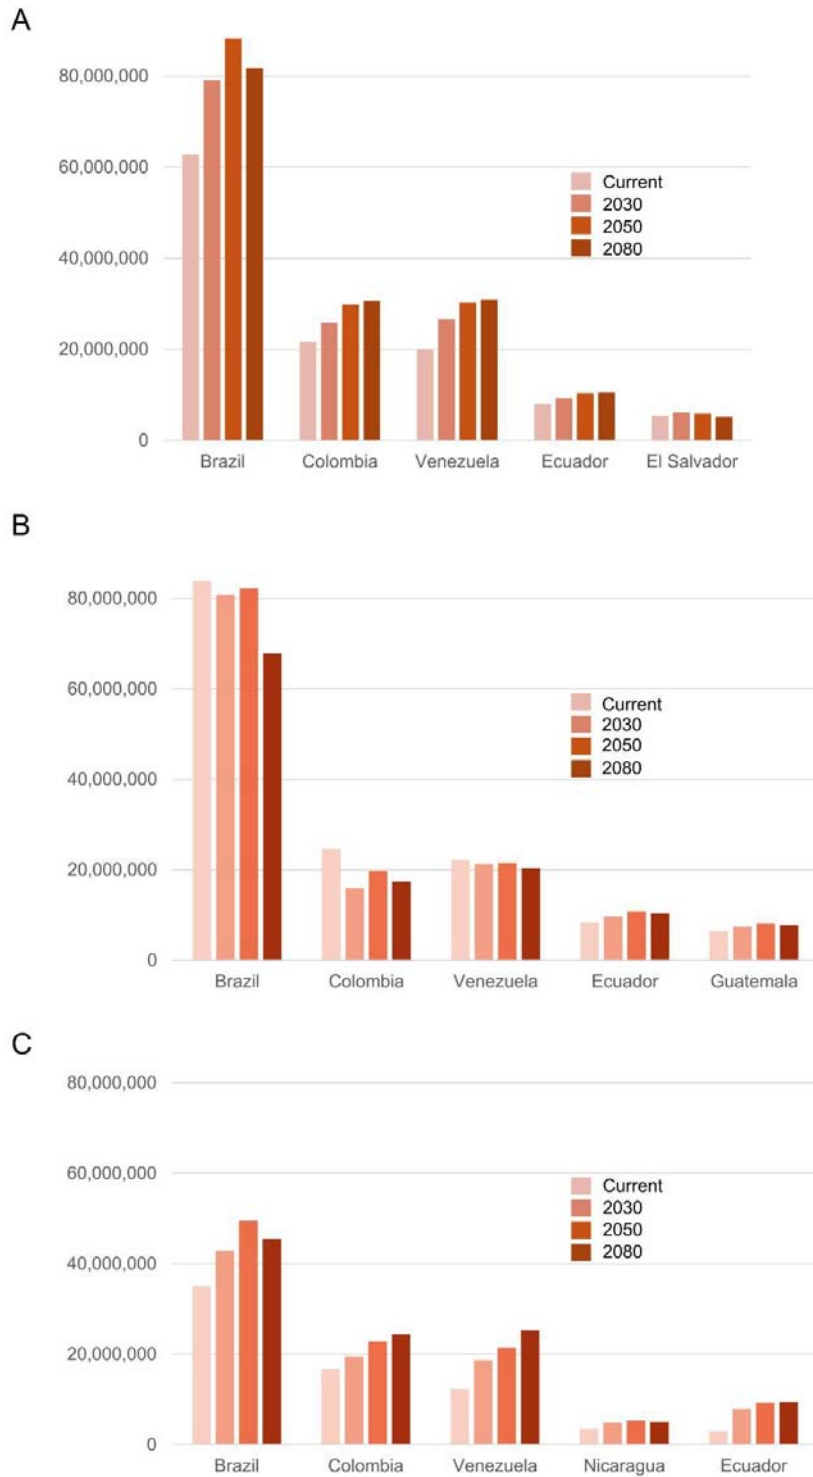

302

303 Fig. 5. Top five countries in Central and South America with the highest population at risk (PAR)

304 for exposure to year-round dengue transmitted by *Ae. aegypti* (A), dengue transmitted by *Ae.*

305 *albopictus* (B) and Zika transmitted by *Ae. aegypti*. PAR will change in the future as geographic

306 suitability shifts under climate change (RCP 4.5 shown).

307

308 *Plasmodium falciparum* transmitted by *Anopheles stephensi*

309

310 Many regions in Central and South America will be suitable for transmission of *P. falciparum* by  
311 *An. stephensi*, both now and in the future if the vector invades and becomes established in the  
312 region (Fig. 6). The NSA, NWA, SAM, and NES regions are almost entirely suitable for year-  
313 round transmission risk, as are northern and central portions of the SES region spanning parts  
314 of Brazil, Paraguay, and Argentina. Notably, areas of suitable transmission extend further south  
315 compared to those of the arboviruses, where the length of the transmission season for *P.*  
316 *falciparum* malaria will become extended throughout much of Argentina. Nearly all of the SCA  
317 region is suitable for year-round *P. falciparum* transmission, putting more of this area at risk  
318 compared to arboviruses. Baseline totals for PAR of transmission exceed the totals for  
319 arboviruses, with over 220 million PAR of year-round transmission and over 441 million PAR for  
320 one or more months (Table 2). Under climate projections, shifting suitability is projected to  
321 initially result in decreased PAR for transmission in some regions in the near future, particularly  
322 under RCP 8.5, with decreases of up to -37.6% in the SSA region by 2030 (Fig. 2). However, by  
323 2050 PAR could increase in every region under RCP 4.5, with the exception of SSA, with gains  
324 in PAR ranging from 5.8% (NES) to 36.6% (NWS) (Fig. 2). Brazil, the country with the highest  
325 baseline PAR, is projected to have modest declines in risk, while other countries including  
326 Venezuela and Colombia, will see marked increases in their at-risk population (Fig. 8A).



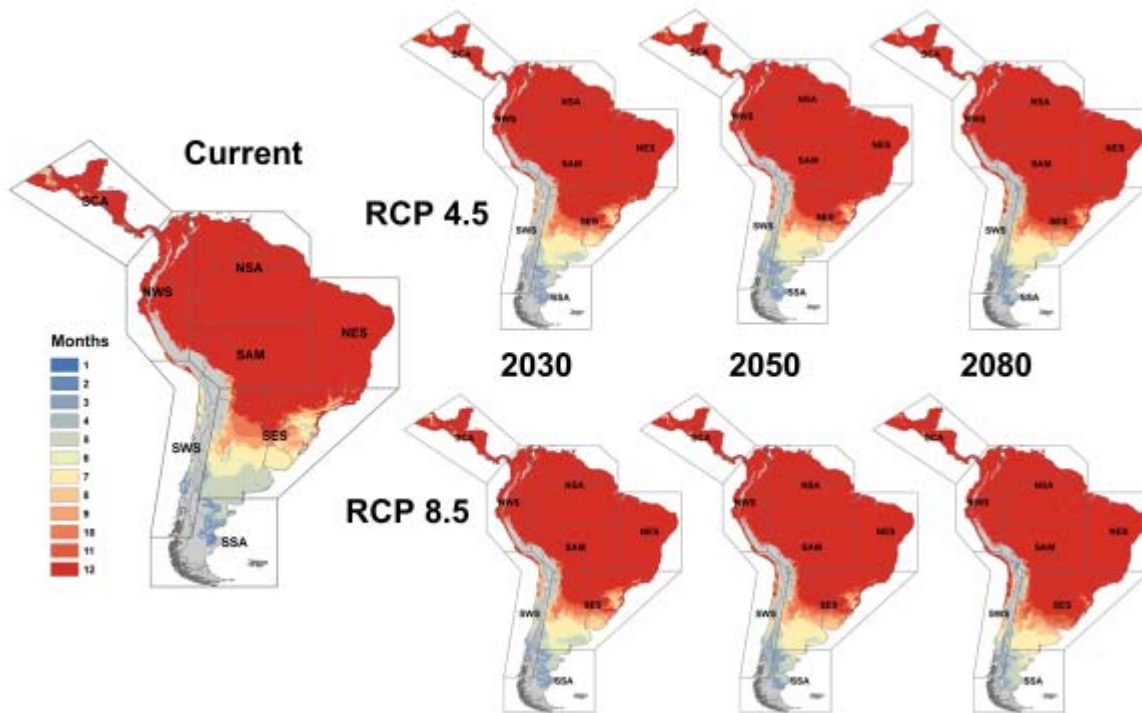

327  
 328 Fig. 6. Thermal suitability for transmission of *Plasmodium falciparum* malaria by the potential  
 329 invasive *Anopheles stephensi*.  
 330

331  
 332 *Plasmodium vivax* transmitted by *Anopheles stephensi*  
 333

334 The estimated range of transmission suitability for *P. vivax* transmitted by *An. stephensi* is  
 335 similar to that of *P. falciparum* transmission under current climate conditions (Fig. 7). Much of  
 336 the SCA, NWS, NSA, NES, and SAM regions are suitable for year-round malaria transmission,  
 337 as are northern portions of the SES region. In contrast with *P. falciparum*, the length of the *P.*  
 338 *vivax* transmission season begins to shorten throughout the SCA, NSA, NES, and SAM regions  
 339 by 2050, with the most dramatic reductions in season length projected in 2080 under RCP 8.5.  
 340 Despite these reductions, modest increases in transmission suitability are projected in the  
 341 southern portion of the SES region, and northern portion of the SSA region, extending into  
 342 southern Argentina. Although not as high as *P. falciparum* risk, the baseline PAR for *P. vivax*  
 343 transmission still exceeds that of dengue and Zika, with over 203 million PAR of year-round  
 344 transmission, and over 437 million PAR for one or more months (Table 2). Although we expect  
 345 some reductions in PAR under RCP 4.5 (-31.7% in SSA by 2030) and RCP 8.5 (-33.1% in SSA  
 346 by 2030 under RCP), we generally expect to see steady increases in PAR for most regions,  
 347 ranging from 2.0% (NES by 2030 at RCP 4.5) to 38.2% (SCA by 2080 under RCP 4.5) and



348 39.5% (NWS by 2080 under RCP 4.5) (Fig. 2). At the national level, an overall decrease in PAR  
349 is expected in Brazil, though Venezuela and Colombia will experience slight gains in PAR by  
350 2050 (Fig. 7B).

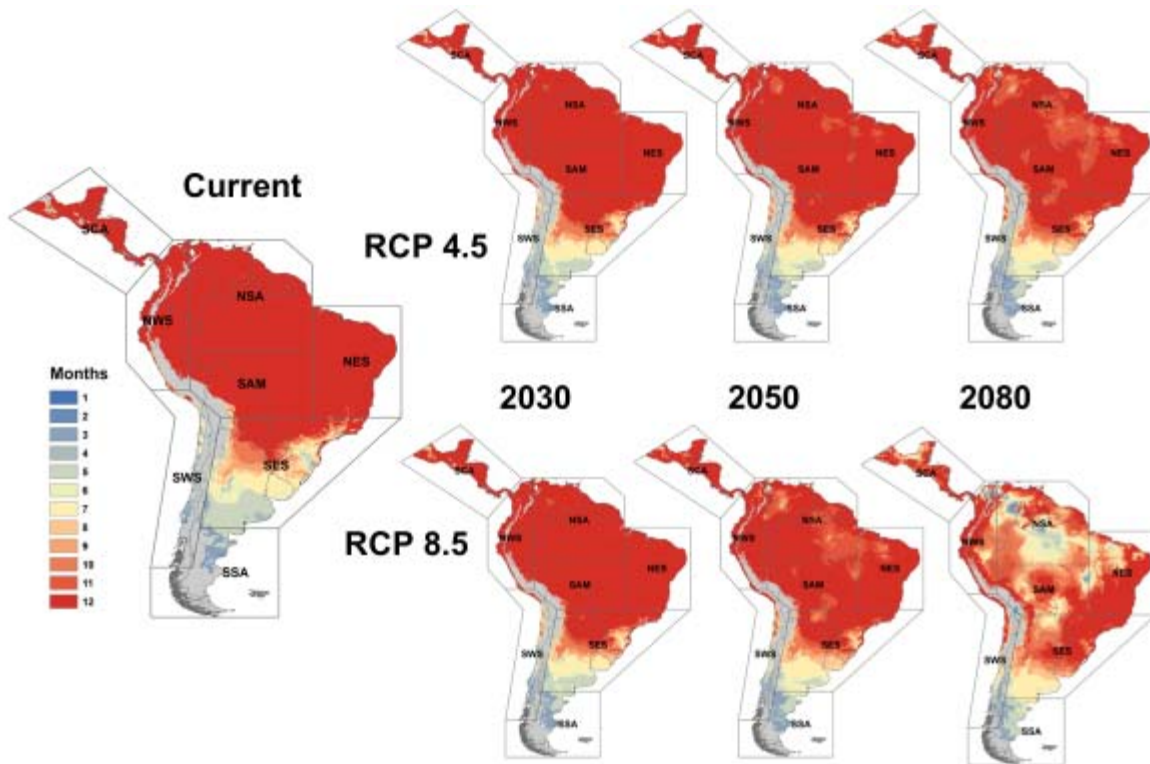

351  
352 Fig. 7. Thermal suitability for transmission of *Plasmodium vivax* malaria by the potential invasive  
353 *Anopheles stephensi*.

A

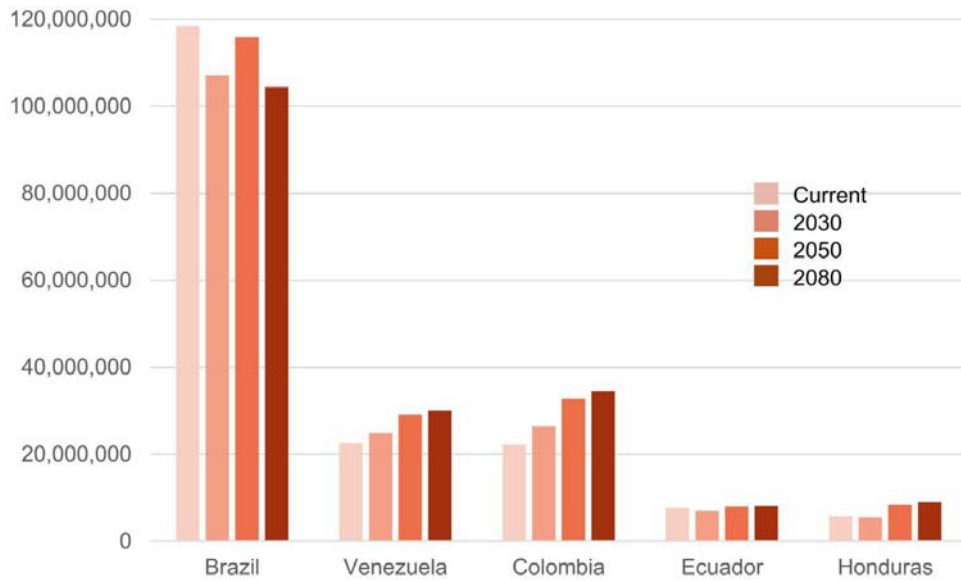

B

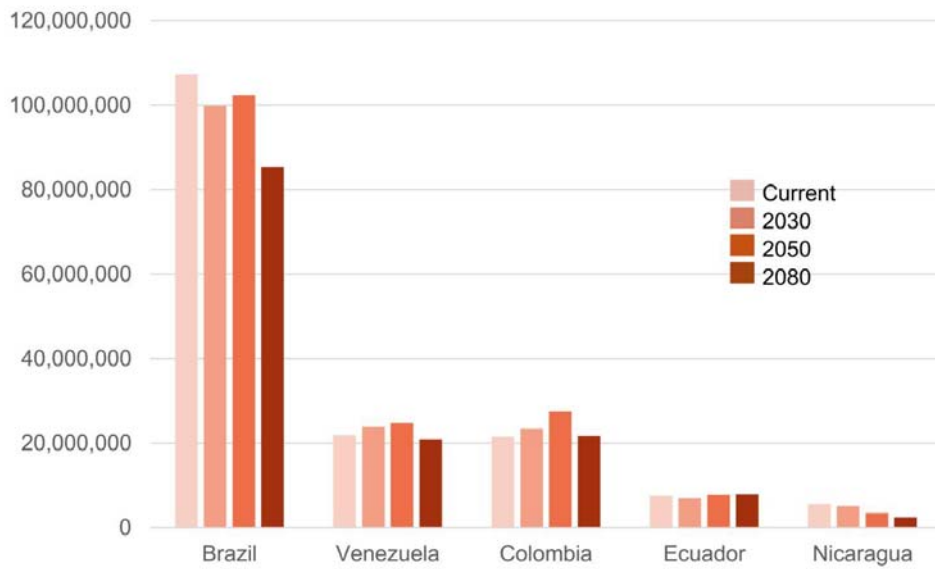

354

355 Fig. 8. Top five countries in Central and South America with the highest population at risk (PAR)  
 356 for exposure to year-round *P. falciparum* malaria (A) and *P. vivax* malaria (B) transmitted by the  
 357 potential invasive *An. stephensi*. PAR will change in the future as geographic suitability shifts  
 358 under climate change (RCP 4.5 shown).  
 359

360

361

362 **Discussion**

363 This study documents the current and projected potential exposure risk for five container  
364 breeding mosquito-pathogen pairings, encompassing three mosquito species (*Aedes aegypti*,  
365 *Ae albopictus*, *Anopheles stephensi*), and four pathogens (DENV, ZIKV, *Plasmodium*  
366 *falciparum*, and *Plasmodium vivax*) in Latin America. These findings describe risk for countries  
367 of Central and South America captured in the IPCC AR6 Working Group II report chapter of the  
368 same name, which describes the present-day and future thermal suitability risk of DENV and  
369 ZIKV transmission in the region [47]. This study extends and expands upon the descriptions in  
370 Castellanos et al [47], adding the potential risk from two malaria transmission scenarios in the  
371 event of invasion and introduction of the novel *Anopheles stephensi* vector. This study also  
372 disaggregates all scenarios to the country level, to allow more comprehensive examinations of  
373 baseline and future projections in the region.

374  
375 We show here that a combination of projected human population changes and climate change  
376 scenarios drive vastly different responses in the number of people exposed to mosquito-borne  
377 disease transmission risk at different time horizons. These patterns depend on the underlying  
378 physiology and temperature responses of mosquito-pathogen pairings. In an increasingly  
379 urbanizing world, the capacity of mosquitoes to use artificially generated breeding habitat -  
380 containers for water storage, puddling on non-porous surfaces, ditches, garbage able to capture  
381 even small volumes of standing water - is amplified, and complicates the effects of seasonal  
382 precipitation. Thus, understanding risk as the intersection of thermal transmission suitability and  
383 human population characteristics provides us with a means to - even at a broad scale -  
384 anticipate and target vector control activity. In addition, this provides evidentiary support to  
385 develop health sector responses to climate change - e.g. to include these considerations in  
386 Health National Adaptation Plans (HNAPs). As an illustration, even when the geographic range  
387 of thermal suitability appears to be fairly consistent across most scenarios, as with dengue  
388 transmitted by *Ae. aegypti*, or *P. falciparum* malaria spread by *An. stephensi*, we still found  
389 dramatic changes in both the magnitude and geographic distribution of people at risk (PAR). As  
390 the socioeconomic pathway projections (SSPs) include spatially implicit population shifts in  
391 response to climate, these changes we found will be additionally driven by the movement of  
392 people in response to climate change [41,48].

393  
394 Dengue virus transmitted by *Ae. aegypti* currently imposes major public health burdens  
395 throughout Central and South America, as evidenced by historically large outbreaks in 2019 and

396 2023 [49]. As shown here and elsewhere, dengue will continue to be a public health threat in the  
397 future as overall transmission suitability increases and shifts, placing new populations at risk of  
398 disease. In contrast, *Ae. albopictus*, though a competent dengue vector, is currently not as  
399 widely distributed throughout the Americas [50], but shows patterns of ongoing invasion and  
400 establishment. If this species were to become broadly established, due to its lower tolerance for  
401 high temperatures, and preference for more temperate habitats, it is currently predicted to  
402 experience greatly diminished areas of suitability in the future, corresponding to massive  
403 reductions in PAR of dengue exposure from this species. Nonetheless, in the absence of *Ae.*  
404 *aegypti*, it is probable that *Ae. albopictus* would become the primary vector of arboviruses  
405 [51,52]. Thus, *Ae. albopictus* presents a persistent risk for dengue transmission despite  
406 fragmented future suitability, particularly in cooler climates that would otherwise suppress  
407 transmission from *Ae. aegypti*, such as high elevations in mountainous regions [53], and  
408 currently temperate areas. Emerging precision and targeted vector control methods are  
409 becoming more prevalent and tailored to specific species, such as *Ae. aegypti* (e.g. improved  
410 sterile insect techniques [54,55], gene drive approaches [56,57], and transgenics [58]),.  
411 However, these findings highlight the importance of remaining vigilant to non-target species  
412 such as *Ae. albopictus*.

413

414 *Anopheles stephensi* presents the spectre of a novel potential invader and malaria vector in the  
415 Americas. This mosquito has left its native range of the Indian subcontinent and parts of the  
416 Middle East. It has become established in urban and periurban settings across the African  
417 continent, where it has caused unprecedented urban malaria outbreaks in its introduced range  
418 [34]. In light of this global public health threat, the World Health Organization has released  
419 vector alerts concerning the spread of *An. stephensi* in 2019 [59] and in 2023 [60], underscoring  
420 the importance of preparing vector control agencies for the potential arrival of this new malaria  
421 vector.

422

423 The potential invasion of this vector is a threat to malaria elimination efforts throughout much of  
424 Latin America. *Anopheles stephensi* is a competent vector for *P. falciparum* and *P. vivax*  
425 malaria. Much of Latin America already experiences suitable temperatures for the vector and  
426 the region is projected to experience additional months of suitability and increases in PAR.  
427 Introductions and establishments in novel African locations have been attributed to possible port  
428 introductions, as well as possible land transportation route paths for goods [7]. This is equally  
429 feasible in Latin America via connections to the global trade network and multiple international

430 ports. Clinical interventions and surveillance programs for malaria have been scaled back in  
431 some areas following elimination due to a myriad of social and ecological factors, including drug  
432 resistance, climate, agricultural expansion, waning political will, and declines in external funding  
433 [29]. However, as an urban container breeding mosquito, the control of *An. stephensi* would in  
434 many ways align with existing vector control operations for *Aedes spp.* mosquitoes, requiring  
435 minimal additional investments for capacity building and resource allocation [34]. Thus,  
436 strengthening surveillance efforts for novel *Anopheles spp* mosquitoes, added training in  
437 entomological identification, and clear communication for reporting findings of *An. stephensi*,  
438 introduced or newly established, will be essential to preparing for this potential novel vector.

439 To facilitate the utility of the mapping approach adopted in this study, it is essential that model  
440 outputs are available. For this work, we strive to present summary information within this study  
441 to describe the broad findings and evidence supporting the IPCC report and beyond, to extend  
442 this work to a novel potential malaria threat in a changing world. All model output is available on  
443 a public platform (XXX URL when published on Harvard Dataverse), generated at regional and  
444 country levels for all scenarios described. While we aim to add to the toolkit to confront the  
445 challenges of a changing world, communicating via maps, we hope that model output re-use  
446 can contribute to decision-making processes in other ways.

447

## 448 **Conclusions**

449 The combined impacts of global change present major challenges to public health, including  
450 climate change, rapid population shifts, urbanization, and globalized movements of people,  
451 pathogens, goods, and vectors. Quantitative estimates of shifting disease transmission risks are  
452 urgently needed to target climate change adaptation planning in the health sector. In this study,  
453 we present a framework for understanding the potential shifting risk for mosquito borne  
454 diseases transmitted by container breeders in Latin America, for both currently present vectors  
455 and pathogens, and a potential invader, *Anopheles stephensi*. There is an overall trend of  
456 increased risk and geographic shifts into novel spaces. Investment in existing best practices in  
457 vector surveillance and control strategies for container-breeders, and novel control strategies  
458 will be needed to support adaptation actions and protect human health.

459

460

461 **Data Availability**

462 All population product data used within are freely available online, all climate layers comprising  
463 the ensemble are freely available online, as described in methods. Please contact S.J. Ryan for  
464 gridded ensemble climate layers used. R code is available from S.J. Ryan and is a compilation  
465 of previously published code used in published articles cited within. All model outputs described  
466 within are posted on Harvard Dataverse at: (XXX URL when published).

467  
468 **Funding Information**

469 No funding

470

471

472 **References**

- 473 1. Mordecai EA, Caldwell JM, Grossman MK, Lippi CA, Johnson LR, Neira M, et al. Thermal  
474 biology of mosquito-borne disease. *Ecology Letters*. 2019;22: 1690–1708.  
475 doi:10.1111/ele.13335
- 476 2. Ryan SJ, Carlson CJ, Mordecai EA, Johnson LR. Global expansion and redistribution of  
477 Aedes-borne virus transmission risk with climate change. *PLoS Negl Trop Dis*. 2019;13:  
478 e0007213. doi:10.1371/journal.pntd.0007213
- 479 3. Campbell LP, Luther C, Moo-Llanes D, Ramsey JM, Danis-Lozano R, Townsend Peterson  
480 A. Climate change influences on global distributions of dengue and chikungunya virus  
481 vectors. *Philosophical Transactions of the Royal Society B*. 2015;370: 20140135.  
482 doi:10.1098/rstb.2014.0135
- 483 4. Mordecai EA, Ryan SJ, Caldwell JM, Shah MM, LaBeaud AD. Climate change could shift  
484 disease burden from malaria to arboviruses in Africa. *The Lancet Planetary Health*. 2020;4:  
485 e416–e423. doi:10.1016/S2542-5196(20)30178-9
- 486 5. Ryan SJ. Mapping Thermal Physiology of Vector-Borne Diseases in a Changing Climate:  
487 Shifts in Geographic and Demographic Risk of Suitability. *Current Environmental Health*  
488 *Reports*. 2020;7: 415–423. doi:10.1007/s40572-020-00290-5
- 489 6. Swan T, Russell TL, Staunton KM, Field MA, Ritchie SA, Burkot TR. A literature review of  
490 dispersal pathways of *Aedes albopictus* across different spatial scales: implications for  
491 vector surveillance. *Parasit Vectors*. 2022;15: 303. doi:10.1186/s13071-022-05413-5
- 492 7. Ahn J, Sinka M, Irish S, Zohdy S. Modeling marine cargo traffic to identify countries in  
493 Africa with greatest risk of invasion by *Anopheles stephensi*. *Sci Rep*. 2023;13: 876.  
494 doi:10.1038/s41598-023-27439-0
- 495 8. Faulde MK, Rueda LM, Khairah BA. First record of the Asian malaria vector *Anopheles*  
496 *stephensi* and its possible role in the resurgence of malaria in Djibouti, Horn of Africa. *Acta*

- 497 Trop. 2014;139: 39–43. doi:10.1016/j.actatropica.2014.06.016
- 498 9. Kenneson A, Beltrán-Ayala E, Borbor-Cordova MJ, Polhemus ME, Ryan SJ, Endy TP, et al.  
499 Social-ecological factors and preventive actions decrease the risk of dengue infection at the  
500 household-level: Results from a prospective dengue surveillance study in Machala,  
501 Ecuador. PLoS Negl Trop Dis. 2017;11: e0006150. doi:10.1371/journal.pntd.0006150
- 502 10. Lippi CA, Stewart-Ibarra AM, Muñoz ÁG, Borbor-Cordova MJ, Mejía R, Rivero K, et al. The  
503 Social and Spatial Ecology of Dengue Presence and Burden during an Outbreak in  
504 Guayaquil, Ecuador, 2012. Int J Environ Res Public Health. 2018;15: 827.  
505 doi:10.3390/ijerph15040827
- 506 11. Kache PA, Santos-Vega M, Stewart-Ibarra AM, Cook EM, Seto KC, Diuk-Wasser MA.  
507 Bridging landscape ecology and urban science to respond to the rising threat of mosquito-  
508 borne diseases. Nat Ecol Evol. 2022;6: 1601–1616. doi:10.1038/s41559-022-01876-y
- 509 12. Stewart Ibarra AM, Ryan SJ, Beltrán E, Mejía R, Silva M, Muñoz A. Dengue vector  
510 dynamics (*Aedes aegypti*) influenced by climate and social factors in Ecuador: implications  
511 for targeted control. Mores CN, editor. PLoS One. 2013;8: e78263.  
512 doi:10.1371/journal.pone.0078263
- 513 13. Ryan SJ, Lippi CA, Nightingale R, Hamerlinck G, Borbor-Cordova MJ, Cruz B M, et al.  
514 Socio-Ecological Factors Associated with Dengue Risk and *Aedes aegypti* Presence in the  
515 Galápagos Islands, Ecuador. Int J Environ Res Public Health. 2019;16: 682.  
516 doi:10.3390/ijerph16050682
- 517 14. Lippi CA, Stewart-Ibarra AM, Endy TP, Abbott M, Cueva C, Heras F, et al. Exploring the  
518 utility of social-ecological and entomological risk factors for dengue infection as surveillance  
519 indicators in the dengue hyper-endemic city of Machala, Ecuador. PLoS Negl Trop Dis.  
520 2021;15: e0009257. doi:10.1371/journal.pntd.0009257
- 521 15. Stewart Ibarra AM, Luzadis VA, Borbor Cordova MJ, Silva M, Ordoñez T, Beltrán Ayala E,  
522 et al. A social-ecological analysis of community perceptions of dengue fever and *Aedes*  
523 *aegypti* in Machala, Ecuador. BMC Public Health. 2014;14: 1135. doi:10.1186/1471-2458-  
524 14-1135
- 525 16. Caprara A, Lima JW de O, Marinho ACP, Calvasina PG, Landim LP, Sommerfeld J.  
526 Irregular water supply, household usage and dengue: a bio-social study in the Brazilian  
527 Northeast. Cad Saude Publica. 2009;25 Suppl 1: S125–36. doi:10.1590/s0102-  
528 311x2009001300012
- 529 17. Quintero J, Brochero H, Manrique-Saide P, Barrera-Pérez M, Basso C, Romero S, et al.  
530 Ecological, biological and social dimensions of dengue vector breeding in five urban  
531 settings of Latin America: a multi-country study. BMC Infect Dis. 2014;14: 38.  
532 doi:10.1186/1471-2334-14-38
- 533 18. Martin JL, Lippi CA, Stewart-Ibarra AM, Ayala EB, Mordecai EA, Sippy R, et al. Household  
534 and climate factors influence *Aedes aegypti* presence in the arid city of Huaquillas,  
535 Ecuador. PLoS Negl Trop Dis. 2021;15: e0009931. doi:10.1371/journal.pntd.0009931
- 536 19. Ryan SJ, Lippi CA, Zermoglio F. Shifting transmission risk for malaria in Africa with climate  
537 change: a framework for planning and intervention. Malar J. 2020;19: 170.

- 538 doi:10.1186/s12936-020-03224-6
- 539 20. Ryan SJ, Carlson CJ, Tesla B, Bonds MH, Ngonghala CN, Mordecai EA, et al. Warming  
540 temperatures could expose more than 1.3 billion new people to Zika virus risk by 2050.  
541 *Glob Chang Biol.* 2021;27: 84–93. doi:10.1111/gcb.15384
- 542 21. PAHO. PLISA Health Information Platform for the Americas: Dengue cases. Washington,  
543 D.C.: Pan American Health Organization; 2020. Available:  
544 [https://www3.paho.org/data/index.php/en/mnu-topics/indicadores-dengue-en/dengue-](https://www3.paho.org/data/index.php/en/mnu-topics/indicadores-dengue-en/dengue-nacional-en/252-dengue-pais-ano-en.html)  
545 [nacional-en/252-dengue-pais-ano-en.html](https://www3.paho.org/data/index.php/en/mnu-topics/indicadores-dengue-en/dengue-nacional-en/252-dengue-pais-ano-en.html)
- 546 22. PAHO. Dengue prevention and control during COVID-19 pandemic. Washington, D.C.: Pan  
547 American Health Organization; 2020.
- 548 23. PAHO/WHO Data - ZIKA. [cited 10 Jul 2023]. Available:  
549 <https://www3.paho.org/data/index.php/en/mnu-topics/zika-subregions-en/>
- 550 24. World Health Organization. World malaria report 2022. World Health Organization; 2022.  
551 Available: <https://play.google.com/store/books/details?id=ST-hEAAQBAJ>
- 552 25. Recht J, Siqueira AM, Monteiro WM, Herrera SM, Herrera S, Lacerda MVG. Malaria in  
553 Brazil, Colombia, Peru and Venezuela: current challenges in malaria control and  
554 elimination. *Malar J.* 2017;16: 273. doi:10.1186/s12936-017-1925-6
- 555 26. PAHO. Belize certified malaria-free by WHO. 21 Jun 2023 [cited 19 Sep 2023]. Available:  
556 <https://www.paho.org/en/news/21-6-2023-belize-certified-malaria-free-who>
- 557 27. Balakrishnan VS. El Salvador's malaria elimination success story. *Lancet Microbe.* 2021;2:  
558 e181. doi:10.1016/S2666-5247(21)00096-3
- 559 28. Pan American Health Organization. Plan of Action for Malaria Elimination 2021-2025.  
560 PAHO; 2022 Oct. Report No.: PAHO/CDE/VT/22-0005. Available:  
561 <https://iris.paho.org/handle/10665.2/56616>
- 562 29. Krisher LK, Krisher J, Ambuludi M, Arichabala A, Beltrán-Ayala E, Navarrete P, et al.  
563 Successful malaria elimination in the Ecuador–Peru border region: epidemiology and  
564 lessons learned. *Malar J.* 2016;15: 1–15. doi:10.1186/s12936-016-1630-x
- 565 30. Jaramillo-Ochoa R, Sippy R, Farrell DF, Cueva-Aponte C, Beltrán-Ayala E, Gonzaga JL, et  
566 al. Effects of Political Instability in Venezuela on Malaria Resurgence at Ecuador-Peru  
567 Border, 2018. *Emerg Infect Dis.* 2019;25: 834–836. doi:10.3201/eid2504.181355
- 568 31. Gunderson AK, Kumar RE, Recalde-Coronel C, Vasco LE, Valle-Campos A, Mena CF, et  
569 al. Malaria Transmission and Spillover across the Peru-Ecuador Border: A Spatiotemporal  
570 Analysis. *Int J Environ Res Public Health.* 2020;17. doi:10.3390/ijerph17207434
- 571 32. Grillet ME, Moreno JE, Hernández-Villena JV, Vincenti-González MF, Noya O, Tami A, et  
572 al. Malaria in Southern Venezuela: The hottest hotspot in Latin America. *PLoS Negl Trop*  
573 *Dis.* 2021;15: e0008211. doi:10.1371/journal.pntd.0008211
- 574 33. Ryan SJ, Lippi CA, Villena OC, Singh A, Murdock CC, Johnson LR. Mapping current and  
575 future thermal limits to suitability for malaria transmission by the invasive mosquito  
576 *Anopheles stephensi*. *Malar J.* 2023;22: 104. doi:10.1186/s12936-023-04531-4



- 577 34. Allan R, Budge S, Sauskojus H. What sounds like Aedes, acts like Aedes, but is not  
578 Aedes? Lessons from dengue virus control for the management of invasive Anopheles.  
579 *Lancet Glob Health*. 2023;11: e165–e169. doi:10.1016/S2214-109X(22)00454-5
- 580 35. IPCC. Regional fact sheet – Central and South America. Intergovernmental Panel on  
581 Climate Change; 2021. Report No.: Sixth Assessment Report, Working Group I – The  
582 Physical Science Basis. Available:  
583 [https://www.ipcc.ch/report/ar6/wg1/downloads/factsheets/IPCC\\_AR6\\_WGI\\_Regional\\_Fact\\_Sheet\\_Central\\_and\\_South\\_America.pdf](https://www.ipcc.ch/report/ar6/wg1/downloads/factsheets/IPCC_AR6_WGI_Regional_Fact_Sheet_Central_and_South_America.pdf)  
584
- 585 36. Mordecai EA, Cohen JM, Evans MV, Gudapati P, Johnson LR, Lippi CA, et al. Detecting  
586 the impact of temperature on transmission of Zika, dengue, and chikungunya using  
587 mechanistic models. *PLoS Negl Trop Dis*. 2017;11: e0005568.  
588 doi:10.1371/journal.pntd.0005568
- 589 37. Tesla B, Demakovskiy LR, Mordecai EA, Ryan SJ, Bonds MH, Ngonghala CN, et al.  
590 Temperature drives Zika virus transmission: evidence from empirical and mathematical  
591 models. *Proc Biol Sci*. 2018;285: 20180795. doi:10.1098/rspb.2018.0795
- 592 38. Villena OC, Ryan SJ, Murdock CC, Johnson LR. Temperature impacts the environmental  
593 suitability for malaria transmission by *Anopheles gambiae* and *Anopheles stephensi*.  
594 *Ecology*. 2022;103: e3685. doi:10.1002/ecy.3685
- 595 39. Ryan SJ, Steynor A, Jack C, Wolski P, van Aardenne L, Lennard C, et al. Shifting Risks of  
596 Malaria in Southern Africa: A Regional Analysis. United States Agency for International  
597 Development Adaptation Thought Leadership and Assessments (USAID-ATLAS); 2020.  
598 Available: <https://www.climatelinks.org/resources/shifting-risks-of-malaria-in-southern-africa>
- 599 40. O'Neill BC, Kriegler E, Ebi KL, Kemp-Benedict E, Riahi K, Rothman DS, et al. The roads  
600 ahead: Narratives for shared socioeconomic pathways describing world futures in the 21st  
601 century. *Global Environmental Change*. 2017. pp. 169–180.  
602 doi:10.1016/j.gloenvcha.2015.01.004
- 603 41. Riahi K, van Vuuren DP, Kriegler E, Edmonds J, O'Neill BC, Fujimori S, et al. The Shared  
604 Socioeconomic Pathways and their energy, land use, and greenhouse gas emissions  
605 implications: An overview. *Glob Environ Change*. 2017;42: 153–168.  
606 doi:10.1016/j.gloenvcha.2016.05.009
- 607 42. Jones B, O'Neill BC. Global Population Projection Grids Based on Shared Socioeconomic  
608 Pathways (SSPs), 2010-2100. NASA Socioeconomic Data and Applications Center  
609 (SEDAC); 2017. doi:10.7927/H4RF5S0P
- 610 43. Rogelj J, Popp A, Calvin KV, Luderer G, Emmerling J, Gernaat D, et al. Scenarios towards  
611 limiting global mean temperature increase below 1.5 °C. *Nature Climate Change*. 2018. pp.  
612 325–332. doi:10.1038/s41558-018-0091-3
- 613 44. Hijmans RJ, van Etten J. raster: Geographic analysis and modeling with raster data. 2012.  
614 Available: <http://CRAN.R-project.org/package=raster>
- 615 45. Hijmans RJ, Bivand R, Forner K, Ooms J, Pebesma E, Sumner MD. Package “terra.”  
616 Maintainer: Vienna, Austria. 2022. Available: [http://cran.uni-](http://cran.uni-muenster.de/web/packages/terra/terra.pdf)  
617 [muenster.de/web/packages/terra/terra.pdf](http://cran.uni-muenster.de/web/packages/terra/terra.pdf)

- 618 46. ESRI. ArcGIS Desktop. Redlands, CA: Environmental Systems Research Institute; 2011.
- 619 47. Castellanos EJ, Lemos MF, Astigarraga L, Chacón N, Cuvi N, Huggel C, et al. Central and  
620 South America. In: Pörtner H, Roberts D, Tignor M, Poloczanska E, Mintenbeck K, Alegria  
621 A, et al., editor. *Climate Change 2022: Impacts, Adaptation and Vulnerability Contribution of*  
622 *Working Group II to the Sixth Assessment Report of the Intergovernmental Panel on*  
623 *Climate Change*. Cambridge University Press; 2022. pp. 1689–1816. Available:  
624 <https://repositorio.inta.gov.ar/handle/20.500.12123/12589>
- 625 48. Kc S, Lutz W. The human core of the shared socioeconomic pathways: Population  
626 scenarios by age, sex and level of education for all countries to 2100. *Glob Environ*  
627 *Change*. 2017;42: 181–192. doi:10.1016/j.gloenvcha.2014.06.004
- 628 49. World Health Organization. Dengue – the Region of the Americas. 19 Jul 2023 [cited 19  
629 Sep 2023]. Available: [https://www.who.int/emergencies/disease-outbreak-news/item/2023-](https://www.who.int/emergencies/disease-outbreak-news/item/2023-DON475)  
630 [DON475](https://www.who.int/emergencies/disease-outbreak-news/item/2023-DON475)
- 631 50. Garcia-Rejon JE, Navarro J-C, Cigarroa-Toledo N, Baak-Baak CM. An Updated Review of  
632 the Invasive *Aedes albopictus* in the Americas; Geographical Distribution, Host Feeding  
633 Patterns, Arbovirus Infection, and the Potential for Vertical Transmission of Dengue Virus.  
634 *Insects*. 2021;12. doi:10.3390/insects12110967
- 635 51. Rezza G. *Aedes albopictus* and the reemergence of Dengue. *BMC Public Health*. 2012;12:  
636 72. doi:10.1186/1471-2458-12-72
- 637 52. Shragai T, Harrington L, Alfonso-Parra C, Avila F. Oviposition site attraction of *Aedes*  
638 *albopictus* to sites with conspecific and heterospecific larvae during an ongoing invasion in  
639 Medellín, Colombia. *Parasit Vectors*. 2019;12: 455. doi:10.1186/s13071-019-3710-6
- 640 53. Lippi CA, Stewart-Ibarra AM, Loor MEFB, Zambrano JED, Lopez NAE, Blackburn JK, et al.  
641 Geographic shifts in *Aedes aegypti* habitat suitability in Ecuador using larval surveillance  
642 data and ecological niche modeling: Implications of climate change for public health vector  
643 control. *PLoS Negl Trop Dis*. 2019;13: e0007322. doi:10.1371/journal.pntd.0007322
- 644 54. Gato R, Menéndez Z, Prieto E, Argilés R, Rodríguez M, Baldoquín W, et al. Sterile Insect  
645 Technique: Successful Suppression of an *Aedes aegypti* Field Population in Cuba. *Insects*.  
646 2021;12. doi:10.3390/insects12050469
- 647 55. Martín-Park A, Che-Mendoza A, Contreras-Perera Y, Pérez-Carrillo S, Puerta-Guardo H,  
648 Villegas-Chim J, et al. Pilot trial using mass field-releases of sterile males produced with the  
649 incompatible and sterile insect techniques as part of integrated *Aedes aegypti* control in  
650 Mexico. *PLoS Negl Trop Dis*. 2022;16: e0010324. doi:10.1371/journal.pntd.0010324
- 651 56. Li M, Yang T, Kandul NP, Bui M, Gamez S, Raban R, et al. Development of a confinable  
652 gene drive system in the human disease vector *Aedes aegypti*. *Elife*. 2020;9.  
653 doi:10.7554/eLife.51701
- 654 57. Anderson MAE, Gonzalez E, Ang JXD, Shackelford L, Nevard K, Verkuijl SAN, et al.  
655 Closing the gap to effective gene drive in *Aedes aegypti* by exploiting germline regulatory  
656 elements. *Nat Commun*. 2023;14: 338. doi:10.1038/s41467-023-36029-7
- 657 58. Waltz E. GM mosquitoes fire first salvo against Zika virus. *Nat Biotechnol*. 2016;34: 221–

- 658           222. doi:10.1038/nbt0316-221
- 659   59. World Health Organization. Vector alert: Anopheles stephensi invasion and spread: Horn of  
660   Africa, the Republic of the Sudan and surrounding geographical areas, and Sri Lanka:  
661   information note. Geneva: World Health Organization; 2019. Available:  
662   <https://apps.who.int/iris/handle/10665/326595>
- 663   60. World Health Organization. Vector alert: Anopheles stephensi invasion and spread in Africa  
664   and Sri Lanka. World Health Organization; 2023 Jan. Available:  
665   <https://www.who.int/publications/i/item/9789240067714>
